# Supplementary material for: Magnetic Polypyrrole-Gelatin-Barium Ferrite Cryogel as an Adsorbent for Chromium (VI) Removal
Source: MDPI journal article supplement (doi:10.3390/gels9100840), 2023-10-23
Supplement: s1 [file s1]

Supplementary Materials

# Magnetic polypyrrole-gelatin-barium ferrite cryogel as an adsorbent for chromium (VI) removal

Konstantin A. Milakin, Oumayma Taboubi, Jiřina Hromádková and Patrycja Bober \*

Institute of Macromolecular Chemistry, Czech Academy of Sciences, 162 00 Prague, Czech Republic;  
milakin@imc.cas.cz (K.A.M.); taboubi@imc.cas.cz (O.T.); hromadkova@imc.cas.cz (J.H.)

\* Correspondence: bober@imc.cas.cz (P.B.)

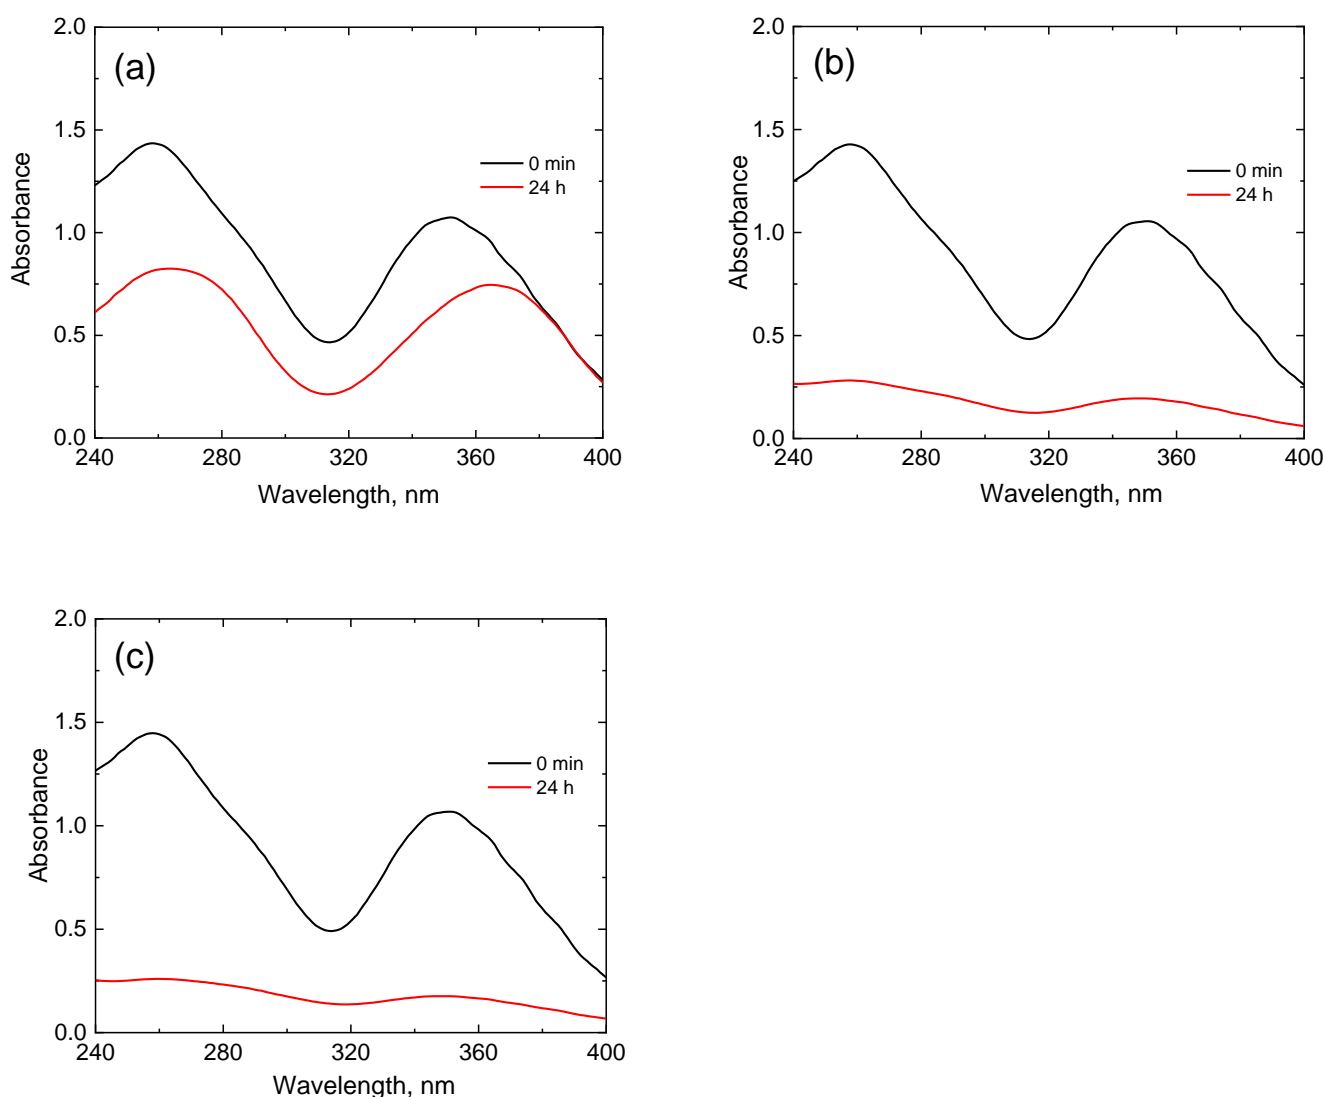

**Figure S1.** Evolution of UV-vis spectra of Cr(VI) solution ( $35 \text{ mg L}^{-1}$ , 20 mL, 5 mg aerogel) over time in contact with PPy-G aerogel at (a) pH 6, (b) pH 4 and (c) pH 2.

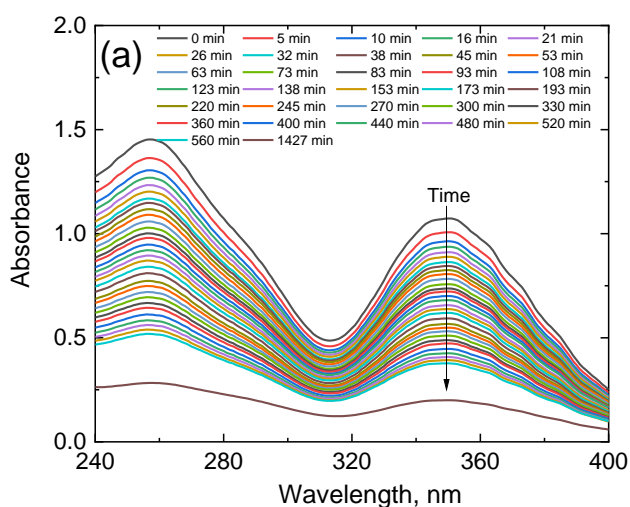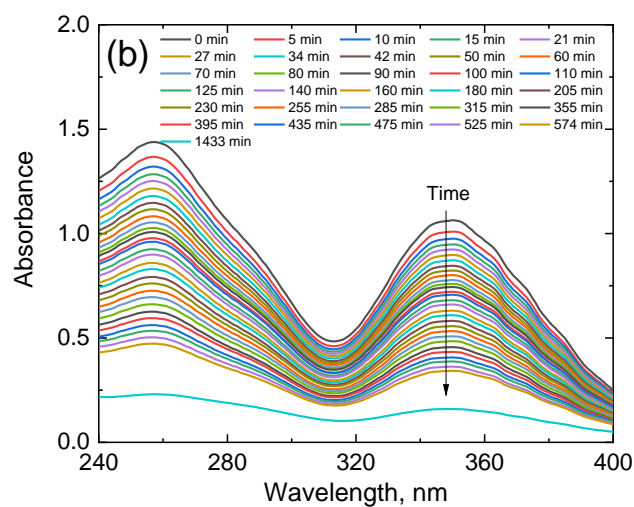

**Figure S2.** Evolution of UV-vis spectra of Cr(VI) solutions ( $35 \text{ mg L}^{-1}$ ,  $20 \text{ mL}$ ,  $\text{pH } 4$ ,  $5 \text{ mg}$  aerogel) over time in the presence of (a) PPy-G and (b) PPy-G-BaFe aerogels.

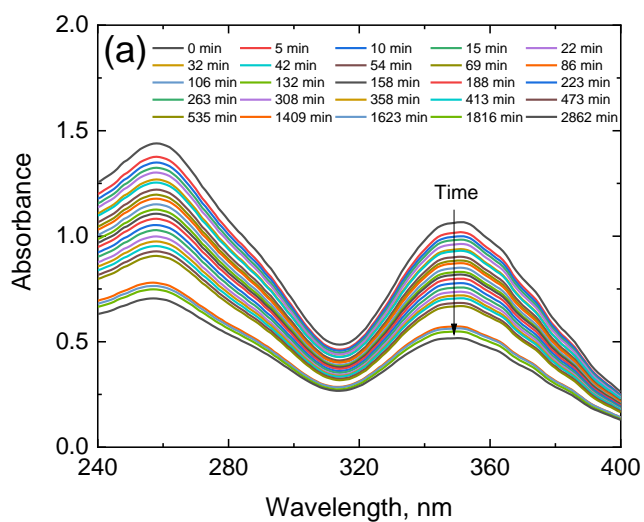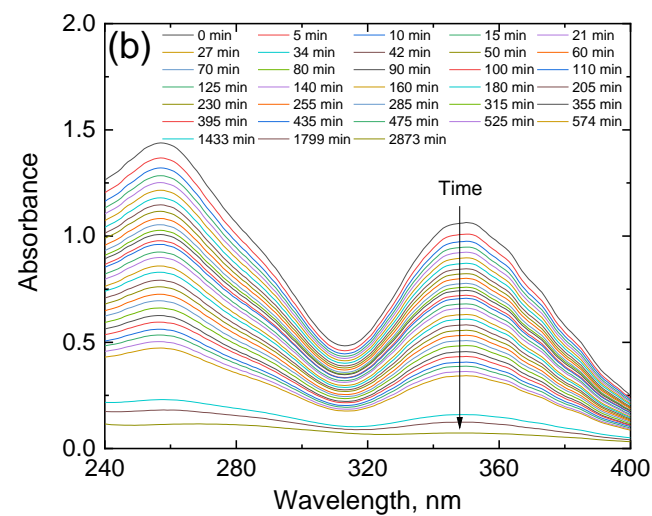

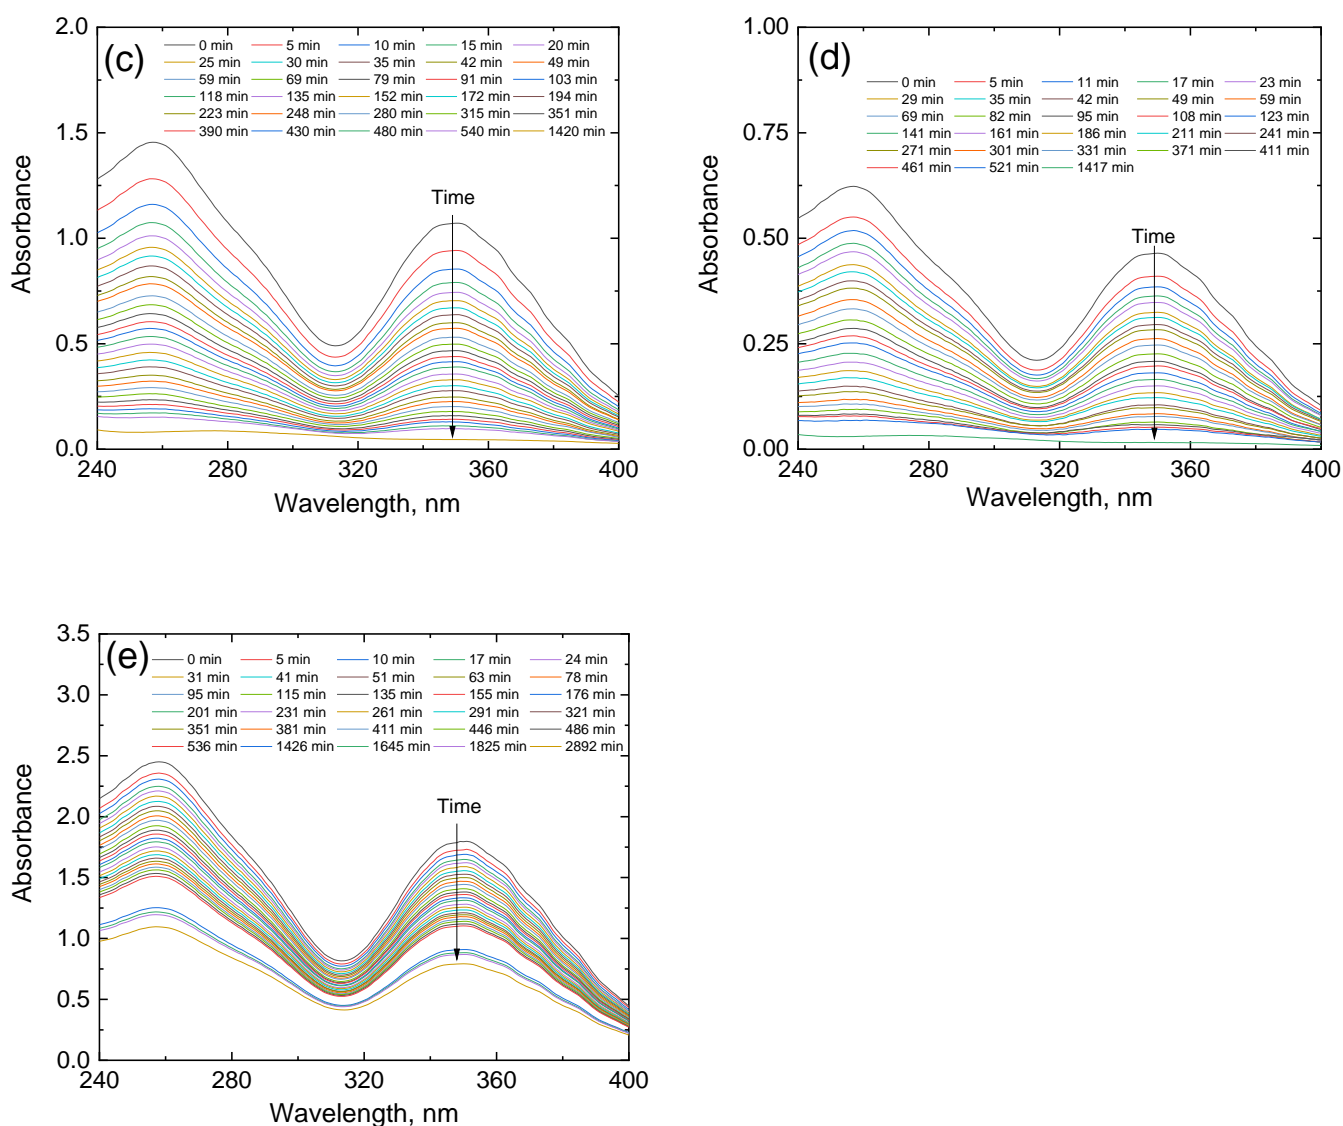

**Figure S3.** Evolution of UV-vis spectra of Cr(VI) solutions (20 mL, pH 4) over time in the presence of PPy-G-BaFe aerogel at various masses of adsorbent (Cr (VI) 35 mg L<sup>-1</sup>) (a) 2.5 mg, (b) 5 mg, (c) 10 mg and at various initial Cr(VI) concentrations (5 mg aerogel) (d) 15 mg L<sup>-1</sup> and (e) 60 mg L<sup>-1</sup>.

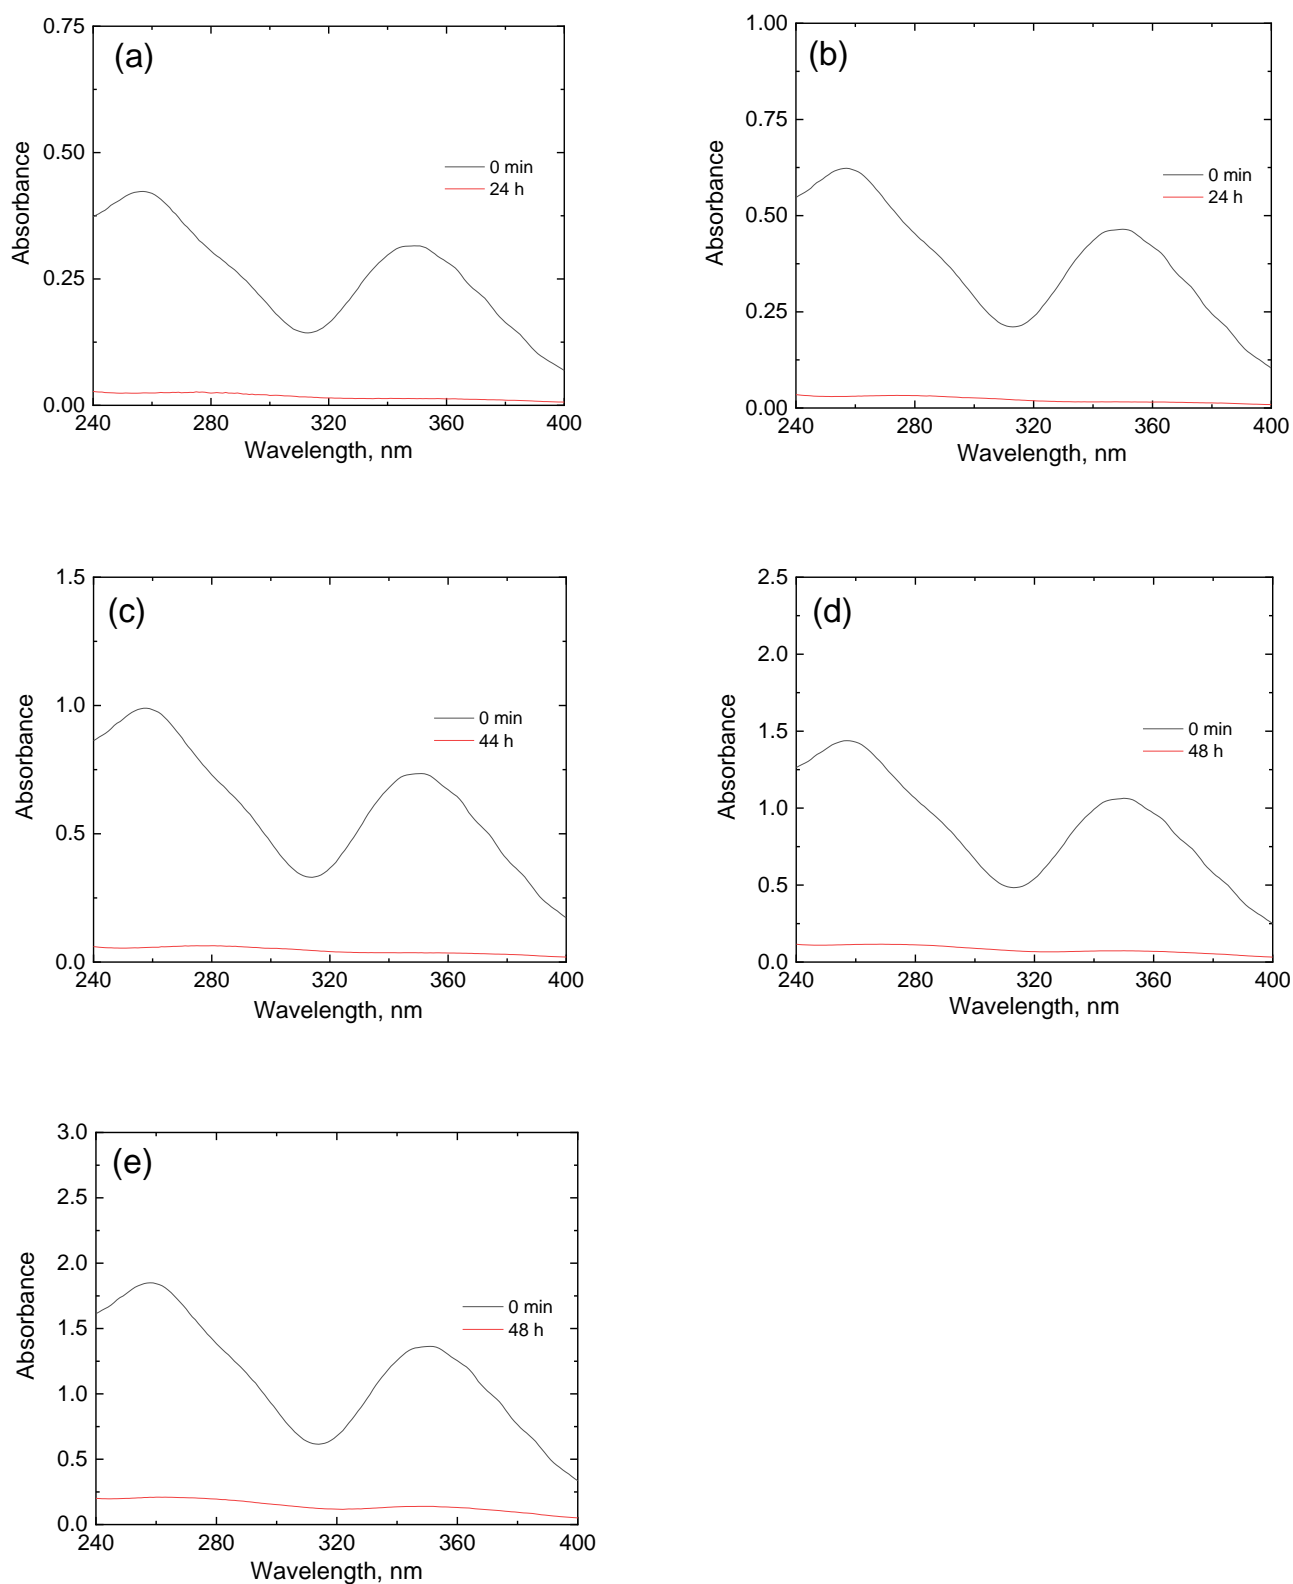

**Figure S4.** Initial and equilibrium UV-vis spectra of Cr(VI) solutions (20 mL, pH 4, 5 mg aerogel) in the presence of PPy-G-BaFe aerogel at various initial Cr(VI) concentrations (a) 10 mg L<sup>-1</sup>, (b) 15 mg L<sup>-1</sup>, (c) 25 mg L<sup>-1</sup>, (d) 35 mg L<sup>-1</sup> and (e) 45 mg L<sup>-1</sup>.

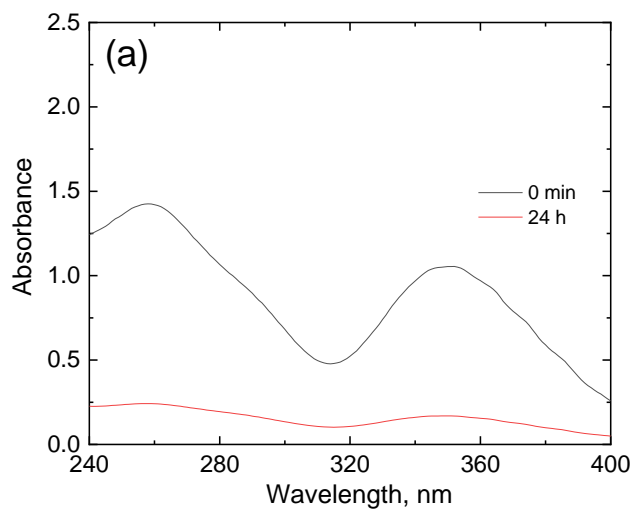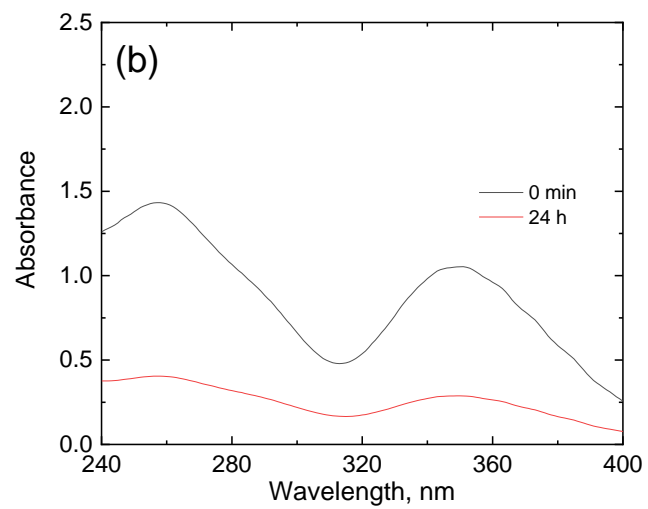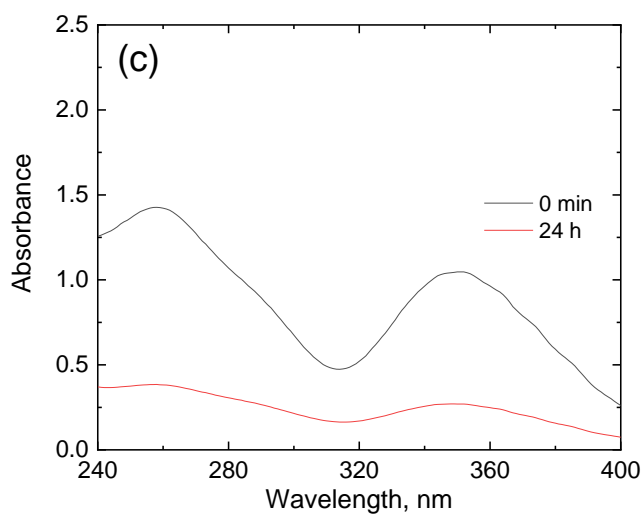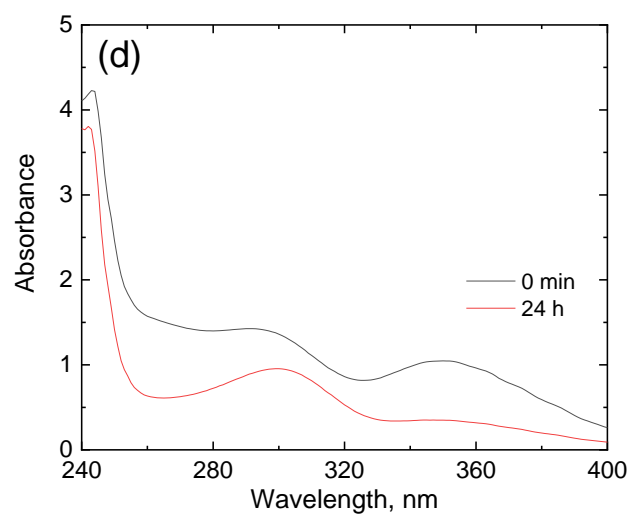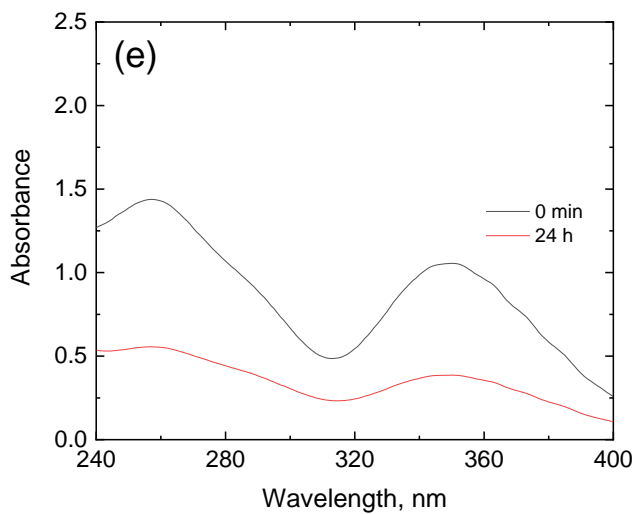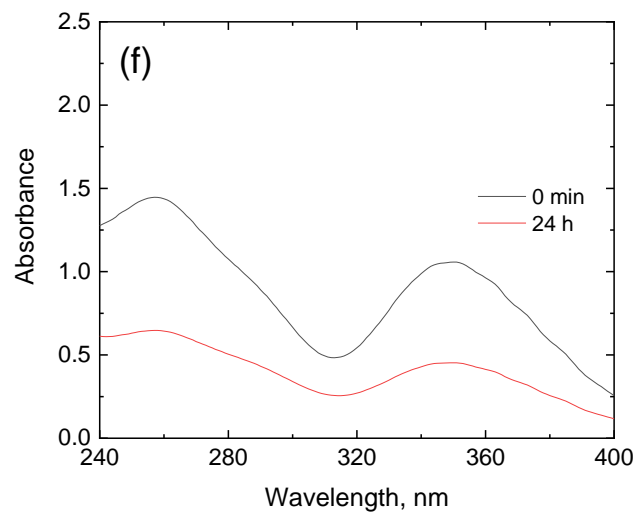

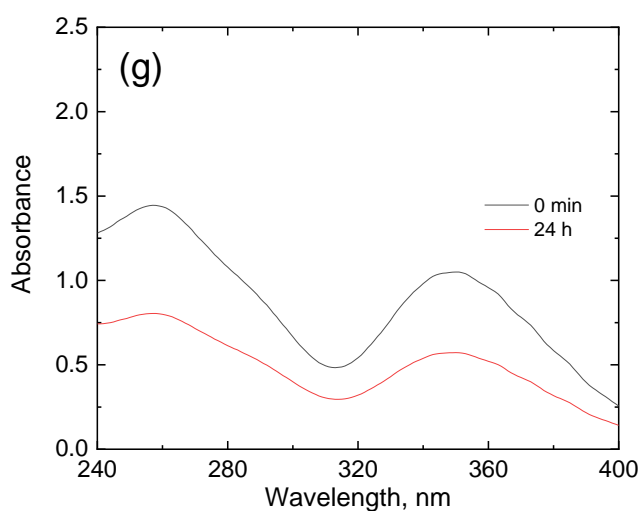

**Figure S5.** Evolution of UV-vis spectra of Cr(VI) solution ( $35 \text{ mg L}^{-1}$ ,  $20 \text{ mL}$ ,  $\text{pH } 4$ ,  $5 \text{ mg}$  aerogel) over time in contact with PPy-G-BaFe aerogel (a) without interference and in the presence of (b)  $0.1 \text{ M NaCl}$ , (c)  $0.1 \text{ M NaBr}$ , (d)  $0.1 \text{ M KNO}_3$ , (e)  $0.033 \text{ M Na}_2\text{SO}_4$ , (f)  $0.05 \text{ M Na}_2\text{SO}_4$  and (g)  $0.1 \text{ M Na}_2\text{SO}_4$ .

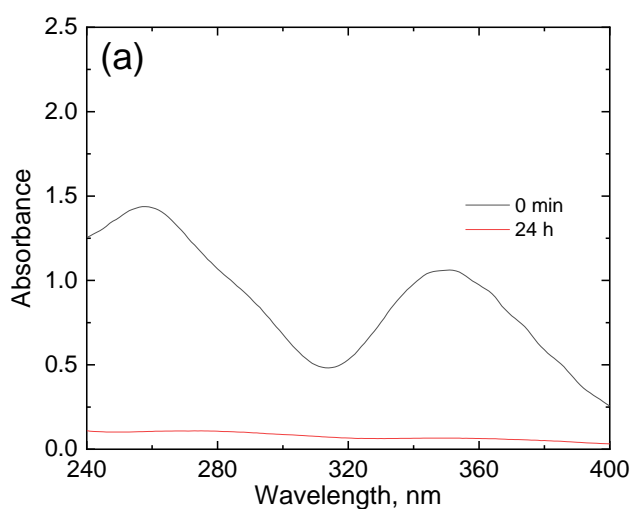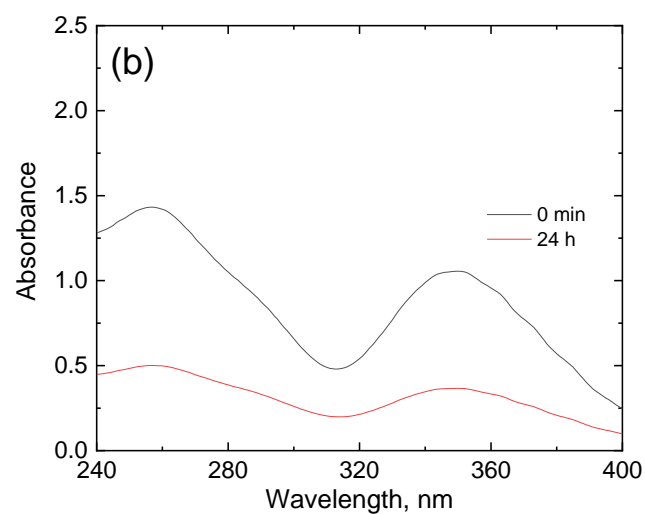

**Figure S6.** Evolution of UV-vis spectra of Cr(VI) solution ( $35 \text{ mg L}^{-1}$ ,  $20 \text{ mL}$ ,  $\text{pH } 4$ ,  $5 \text{ mg}$  aerogel) over time in the presence of PPy-G-BaFe aerogel at consecutive adsorption-desorption cycles: (a) 1st adsorption cycle and (b) 2nd adsorption cycle.
